# Supplementary material for: Detection of Chemical Weapon Agents Using Spectroscopic Probes: A Computational Study
Source: Hindawi journal article supplement (doi:10.1155/2020/1312403), 2020-04-21
Supplement: f1 [file 1312403.f1.pdf]

# Supplemental Material

## **Detection of chemical weapon agents using spectroscopic probes: A Computational Study**

Leticia S. Braga<sup>1</sup>, Érika F. Silva<sup>1</sup>, Daiana T. Mancini<sup>1</sup>, Eduardo P. da Rocha<sup>2</sup>, Elaine F. F. da Cunha<sup>1</sup>, Teodorico C. Ramalho<sup>1</sup>

*<sup>1</sup> Department of Chemistry. Federal University of Lavras,  
University Campus, 37200-000, Lavras-MG, Brazil.*

*<sup>2</sup> Institute Federal of Science, Education and Technology of Southwest MG, Campus Rio Pomba,  
36180000, Rio Pomba, MG, Brazil.*

### S1. Surface Response

Table S1. Values for angles, energies of ground-state (GS) and excited-state (ES) and wavelength calculated for combination of angles employed for building Surface Response.

| $\alpha 1$ | $\alpha 2$ | E (GS)   | E1 (ES) | $\lambda$ (nm) |
|------------|------------|----------|---------|----------------|
| 0          | 0          | -1900.32 | 3.00    | 385.75         |
| 180        | 180        | -1900.17 | 2.59    | 478.47         |
| -180       | 180        | -1900.21 | 2.62    | 472.07         |
| -180       | -180       | -1900.17 | 2.59    | 478.48         |
| 180        | -180       | -1900.17 | 2.59    | 478.48         |
| 0          | 180        | -1900.30 | 3.10    | 398.72         |
| 0          | -180       | -1900.30 | 3.10    | 398.84         |
| 180        | 0          | -1900.29 | 3.03    | 408.72         |
| -180       | 0          | -1900.29 | 3.04    | 407.05         |
| 90         | 90         | -1900.31 | 3.44    | 360.26         |
| -90        | 90         | -1900.31 | 3.53    | 351.21         |
| 90         | -90        | -1900.30 | 3.45    | 359            |
| -90        | -90        | -1900.31 | 3.48    | 355.29         |
| 0          | 100        | -1900.31 | 3.19    | 387.91         |
| 100        | 0          | -1900.30 | 3.46    | 357.87         |
| 50         | 0          | -1900.31 | 3.28    | 377.02         |
| 0          | 50         | -1900.31 | 3.14    | 393.92         |
| -50        | 0          | -1900.31 | 3.33    | 372.27         |
| -40        | 0          | -1900.31 | 3.28    | 377.32         |
| -30        | 0          | -1900.31 | 3.24    | 381.89         |
| -20        | 0          | -1900.31 | 3.21    | 385.34         |
| -10        | 0          | -1900.31 | 3.20    | 386.84         |
| 10         | 0          | -1900.32 | 3.23    | 383.83         |
| 20         | 0          | -1900.32 | 3.25    | 381.22         |
| 30         | 0          | -1900.31 | 3.22    | 384.3          |
| 40         | 0          | -1900.31 | 3.25    | 380.66         |
| 50         | 0          | -1900.31 | 3.28    | 377.02         |

Table S2. Values for angles, energies of ground-state (GS) and excited-state (ES) and wavelength calculated for combination of angles employed for building Surface Response in water solvent.

| $\alpha$ 1 | $\alpha$ 2 | E (GS)   | E1 (ES) | $\lambda$<br>(nm) |
|------------|------------|----------|---------|-------------------|
| 0          | 0          | -1900.34 | 3.00    | 394.16            |
| 180        | 180        | -1900.19 | 2.64    | 468.36            |
| -180       | 180        | -1900.24 | 3.04    | 407.09            |
| -180       | -180       | -1900.19 | 2.64    | 468.36            |
| 180        | -180       | -1900.19 | 2.64    | 468.36            |
| 0          | 180        | -1900.32 | 3.12    | 397.35            |
| 0          | -180       | -1900.32 | 3.11    | 398.17            |
| 180        | 0          | -1900.31 | 3.18    | 389.78            |
| -180       | 0          | -1900.31 | 3.18    | 389.21            |
| 90         | 90         | -1900.33 | 3.26    | 379.36            |
| -90        | 90         | -1900.33 | 3.18    | 389.05            |
| 90         | -90        | -1900.33 | 3.26    | 380.17            |
| -90        | -90        | -1900.34 | 3.55    | 348.74            |
| 0          | 100        | -1900.34 | 3.14    | 393.67            |
| 100        | 0          | -1900.33 | 3.43    | 361.34            |
| 50         | 0          | -1900.34 | 3.22    | 384.39            |
| 0          | 50         | -1900.33 | 3.07    | 402.71            |
| -50        | 0          | -1900.33 | 3.28    | 377.71            |
| -40        | 0          | -1900.34 | 3.23    | 383.04            |
| -30        | 0          | -1900.34 | 3.19    | 387.79            |
| -20        | 0          | -1900.34 | 3.16    | 391.52            |
| -10        | 0          | -1900.34 | 3.14    | 393.78            |
| 10         | 0          | -1900.34 | 3.04    | 407.1             |
| 20         | 0          | -1900.34 | 3.07    | 402.93            |
| 30         | 0          | -1900.34 | 3.10    | 398.79            |
| 40         | 0          | -1900.34 | 3.14    | 394.54            |
| 50         | 0          | -1900.34 | 3.22    | 384.41            |

Table S3. Values for geometric properties from Organophosphorus compounds and the complex with Oxime (distances in Å).

|                      | 1P-2O | 1P-3O | 1P-4O | 1P-5X | 1P-6S | 1P-24N | 1P-C | 1P-O |
|----------------------|-------|-------|-------|-------|-------|--------|------|------|
| Ciclosarin           | 1.46  | 1.58  | 1.59  | 1.60  |       |        |      |      |
| DCP                  | 1.47  | 1.58  | 1.60  | 2.08  |       |        |      |      |
| DFP                  | 1.47  | 1.58  | 1.60  | 1.60  |       |        |      |      |
| GV                   | 1.48  |       |       | 1.61  | 2.10  | 1.66   |      |      |
| VG                   | 1.50  | 1.71  | 1.71  |       | 1.71  |        |      |      |
| Sarin                | 1.46  | 1.59  |       | 1.60  |       |        | 1.58 |      |
| Soman                | 1.46  | 1.59  |       | 1.60  |       |        | 1.58 |      |
| Oxime-Ci<br>closarin | 1.48  | 1.66  | 1.60  |       |       |        |      | 1.80 |
| Oxime-D<br>FP        | 1.50  | 1.70  | 1.71  |       |       |        |      | 1.70 |
| Oxime-G<br>V         | 1.48  | 1.67  | 1.82  |       |       | 1.67   |      |      |
| Oxime-V<br>G         | 1.47  | 1.60  | 1.59  |       |       |        |      | 1.64 |
| Oxime-Sa<br>rin      | 1.48  | 1.66  | 1.60  |       |       |        | 1.80 |      |
| Oxime-So<br>man      | 1.48  | 1.66  | 1.60  |       |       |        | 1.80 |      |
